# Supplementary material for: Frequency of social burden and underage children in neuro-oncological patients
Source: Research Square preprint supplement (doi:10.21203/rs.3.rs-3122940/v1), 2023-07-03
Supplement: Supplementary file 1 [file 9ebb2bbf11c0548abb72d3de.xlsx]

## Sheet: Tabelle2
	Has your physical condition or medical treatment interfered with your family life?		Has your physical condition or medical treatment interfered with your social activities?		Has your physical condition or medical treatment caused you financial difficulties?		Did you feel uncertain about the future?		Did you feel you had setbacks in your condition?		Were you concerned about disruption of family life?		Did your outlook on the future worsen?				How would you rate your overall health during the past week?		How would you rate your overall quality of life during the past week?
Questionnaire	EORTC-qlq-C30		EORTC-qlq-C30		EORTC-qlq-C30		EORTC-qlq-BN20		EORTC-qlq-BN20		EORTC-qlq-BN20		EORTC-qlq-BN20				EORTC-qlq-C30		EORTC-qlq-C30
	n	%	n	%	n	%	n	%	n	%	n	%	n	%			n	%	n	%
Entire Cohort
Complaints																Complaints
Not at all	832	0.427105	633	0.453438	956	0.686289	428	0.222917	694	0.365841	869	0.458817	774	0.409091		7 - excellent	104	0.0531426	131	0.0667686
few / slight complaints	567	0.291068	382	0.273639	242	0.173726	673	0.350521	629	0.331576	524	0.276663	613	0.323996			399	0.203883	442	0.22528
																	546	0.278998	493	0.251274
																	460	0.235054	432	0.220183
moderate complaints	327	0.167864	227	0.162607	134	0.0961953	501	0.260937	361	0.1903	314	0.165787	352	0.186047			293	0.149719	284	0.14475
severe complaints / major impairment	222	0.113963	154	0.110315	61	0.0437904	318	0.165625	213	0.112283	187	0.0987328	153	0.0808668			107	0.0546755	128	0.0652396
																1 - very bad	48	0.0245273	52	0.0265036
Complete and unambiguous information available in consultations	1948		1396		1393		1920		1897		1894		1892			Complete and unambiguous information available in consultations	1957		1962
Patients with malignant tumours
Complaints																Complaints
Not at all	200	0.290276	139	0.298925	269	0.583514	98	0.146051	192	0.286567	218	0.329305	219	0.25			24	0.0348837	30	0.0366748
few / slight complaints	213	0.309144	148	0.31828	103	0.223427	196	0.292101	229	0.341791	215	0.324773	228	0.260274			115	0.167151	132	0.161369
																	203	0.295058	169	0.206601
																	160	0.232558	156	0.190709
moderate complaints	156	0.226415	99	0.212903	69	0.149675	217	0.323398	141	0.210448	128	0.193353	150	0.171233			117	0.170058	169	0.206601
severe complaints / major impairment	120	0.174165	79	0.169892	20	0.0433839	160	0.23845	108	0.161194	101	0.152568	66	0.0753425			46	0.0668605	132	0.161369
																1 - very bad	23	0.0334302	30	0.0366748
Complete and unambiguous information available in consultations	689		465		461		671		670		662		663			Complete and unambiguous information available in consultations	688		818
