# Supplementary material for: Frequency of social burden and underage children in neuro-oncological patients
Source: Research Square preprint supplement (doi:10.21203/rs.3.rs-3122940/v1), 2023-07-03
Supplement: Supplementary file 2 [file fe3d627af6ca613109c3fcd8.xlsx]

## Sheet: Tabelle1
Diagnosis	WHO-grade	n	n (total)	n (benign)	n (malignant)
Cerebral Metastases		64	64		64
Glioma	WHO°1	17	220	17
	WHO°2	61		61
	WHO°3	40			40
	WHO°4	102			102
Meningioma	WHO°3	8	339		8
	WHO°2	38		38
	WHO°1	293		293
Other	Other	21	21	16	5
Pituitary gland adenoma	WHO°1	196	196	196
PCNSL		9	9		9
Schwannoma	WHO°1	32		32
		881		653	228
